# Supplementary material
Source: publisher site journal article supplement (https://www.dovepress.com/article/309340)
Supplement: Supplementary file 1 [file get_supplementary_file.php]

# Annex-I

## English version questionnaire

## Title of the study: Health Communication, Knowledge, Perception, and Behavioral Responses to COVID-19 Outbreak in Dessie, Kombolcha and Kemissie Towns, Amhara region, Northeast Ethiopia: A Mixed-Method Study.

Dear participant, my name is_________________ and I am collecting data for research intended to assess the Health Communication, Knowledge, Perception and Behavioral Responses to Covid-19 Outbreak in Dessie, Kombolcha and Kemissie Towns, Amhara, Northeast Ethiopia: A Mixed-Method Study. The study will have a significant contribution to control and prevent the spread of COVID-19. Now, I want to ask you about your willingness to participate in this study. You have the right not to participate or withdraw from the study at any stage. Additionally, anonymity and confidentiality of the data will be kept.

Do you agree to participate in the study? Yes No

| **No** | | **Question** |
| --- | --- | --- |
| 1. **Socio-demographic characteristics** | | | | | |
| 101 | | How old are you? | | Age ____________(in years) | |
| 102 | | Sex | | 1. 1. Male 2. 2. Female | |
| 103 | | Town | | 1. Dessie 2. Kombolcha 3. Kemissie | |
| 104 | | What is your marital status? | | 1. Married  2. Single  3. Divorced  4 .Widowed  5. Separated | |
| 105 | | What is your religion? | | 1. 1. Orthodox 3. Protestant 2. 2. Muslim 4. Other (specify)_______ | |
| 106 | | Is there anyone living with you? | | 1. 1. I live alone 2. 2. I live with 1 or more persons ________ | |
| 107 | | Educational status | | - - - 1. 1. Not able to read and write       2. 2. Can read and write       3. 3. Primary education       4. 4. Secondary or above education | |
| 108 | | Average monthly income | | __________ Ethiopian Birr | |
| 109 | | Occupation of the respondent | | Housewife  Merchant  employed  Farmer/daily laborer  No job | |
| 110 | | Do you have a chronic illness (DM, HTN, COPD, heart problem etc.)? | | 1. Yes  2. No | |
| **2. Sources of Information about COVID-19** | | | | | |
| **Where did/do you get the information from? (Can choose more than one)** | | | | | Remark |
| 201 | | **Broadcast media**   - - - 1. Yes 2. No | | | “No” skip to 202 |
| 2011 | | **1. Yes 2. No**  A. Television  B. Radio | | |  |
| 202 | | **Print Media**  Yes 2. No | | | “No” skip to 203 |
| 2021 | | 1. **Yes 2. No**   1. Newspapers 2. Books 3. Magazine 4. Folders/Brochures/flyers | | |  |
| 203 | | **Digital Media**  Yes 2. No | | | “No” skip to 204 |
| 2031 | | **Yes 2. No**   1. Podcasts 2. Government Websites 3. YouTube 4. Personal blogs | | |  |
| 204 | | **Social Media/Chat room**   1. Yes 2. No | | | “No” skip to 205 |
| 2041 | | **1. Yes 2. No**   1. Facebook 2. Telegram 3. Twitter 4. WhatsApp 5. Linkedin | | |  |
| 205 | | **Community outreach/other sources**  1. Yes 2. No | | | “No” skip to 206 |
| 2051 | | **1. Yes 2. No**   1. Healthcare professionals 2. COVID-19 Preparation & Prevention taskforce 3. Public figure 4. Religious Leaders | | |  |
| 206 | | **For how many days a week did you get information about COVID-19**   - - - 1. 1. ≤ 3 days 2. 4-6 days 3. Always | | |  |
| **3. Knowledge questions on COVID-19** | | | | | |
| 301 | **The novel corona virus(COVID-19) can be transmitted through**  **1. Yes 2. No 3. Don’t know**  A. Droplets of the affected person (with cough or expiration)  B. By touching contaminated surfaces  C. Touching contaminated coins and banknotes  D. COVID-19 can be transmitted from asymptomatic person | | | | |
| 302 | **Which of the following can be symptoms of the novel coronavirus?**  **1. Yes 2. No 3. Don’t know**  A. Fever  B. Cough  C. Muscle or joint pain / ache  D. Shortness of breath  E. Headache  F. Runny nose  G. Diarrhea  H. Loss of test or smell  I. Sore throat  J. The maximum incubation period is 14 days | | | | |
| 303 | **Which of the following can prevent and control the novel corona virus?**  **1. Yes 2. No 3. Don’t know**  A. Hand washing/using sanitizer  B. Wearing mask  C. Maintain social distancing  D. Covering the mouth and nose when cough and sneeze  E. Avoid going to overcrowded areas  F. Seek medical care/stay home while having symptoms | | | | |
| **4. Perceptions on COVID-19 (Using Health Belief Model)** | | | | | |
| **4.1 Perceived Susceptibility of COVID 19** | | | | | |
| 401 | I consider myself to be at risk of coronavirus infection  1. Strongly Disagree 2. Disagree 3.Neutral 4. Agree 5. Strongly agree | | | | |
| 402 | High chance of infection transmission to family members  1. Strongly Disagree 2. Disagree 3.Neutral 4. Agree 5. Strongly agree | | | | |
| 403 | Easy to get infected in crowded areas.  1. Strongly Disagree 2. Disagree 3.Neutral 4. Agree 5. Strongly agree | | | | |
| 404 | Healthy lifestyle will reduce the chance of infection  1. Strongly Disagree 2. Disagree 3.Neutral 4. Agree 5. Strongly agree | | | | |
| **4.2 Perceived Severity of COVID 19** | | | | | |
| 405 | COVID-19 will be more severe among elderly and peoples with comorbidities  1. Strongly Disagree 2. Disagree 3.Neutral 4. Agree 5. Strongly agree | | | | |
| 406 | If I were infected with COVID-19, I may suffer severe symptoms  1. Strongly Disagree 2. Disagree 3.Neutral 4. Agree 5. Strongly agree | | | | |
| 407 | If I were infected with COVID-19 I could not survive  1. Strongly Disagree 2. Disagree 3.Neutral 4. Agree 5. Strongly agree | | | | |
| 408 | If I got infection of COVID-19, it will disrupt my daily life  1. Strongly Disagree 2. Disagree 3.Neutral 4. Agree 5. Strongly agree | | | | |
| **4.3 Perceived Benefit of COVID 19 preventive measures** | | | | | |
| 409 | Hand washing/using hand sanitizer can prevent COVID-19 infection  1. Strongly Disagree 2. Disagree 3.Neutral 4. Agree 5. Strongly agree | | | | |
| 410 | Covering the mouth and nose can prevent COVID-19 infection  1. Strongly Disagree 2. Disagree 3.Neutral 4. Agree 5. Strongly agree | | | | |
| 411 | Stay home or self-isolation can prevent COVID-19 infection  1. Strongly Disagree 2. Disagree 3.Neutral 4. Agree 5. Strongly agree | | | | |
| 412 | Keep social distance can prevent COVID-19 infection  1. Strongly Disagree 2. Disagree 3.Neutral 4. Agree 5. Strongly agree | | | | |
| - 1. **Perceived Barriers to COVID 19 preventive measures** | | | | | |
| 413 | I don’t wear masks, because I fell discomfort  1. Strongly Disagree 2. Disagree 3.Neutral 4. Agree 5. Strongly agree | | | | |
| 414 | I don’t keep social distance or self-isolation, because it is socially undesirable  1. Strongly Disagree 2. Disagree 3.Neutral 4. Agree 5. Strongly agree | | | | |
| 415 | If I were busy, I would not wash my hands due to the complex steps and the long duration.  1. Strongly Disagree 2. Disagree 3.Neutral 4. Agree 5. Strongly agree | | | | |
| 416 | Due to high cost, I may not have face mask, soap or disinfectant as needed  1. Strongly Disagree 2. Disagree 3.Neutral 4. Agree 5. Strongly agree | | | | |
| 417 | Due to my work condition, I can’t stay at home  1. Strongly Disagree 2. Disagree 3.Neutral 4. Agree 5. Strongly agree | | | | |
| **4.5 perceived self-efficacy to COVID 19 preventive measures** | | | | | |
| 418 | I can prevent COVID-19  1. Strongly Disagree 2. Disagree 3.Neutral 4. Agree 5. Strongly agree | | | | |
| 419 | I can get access to the reliable health information on COVID-19  1. Strongly Disagree 2. Disagree 3.Neutral 4. Agree 5. Strongly agree | | | | |
| 420 | To prevent COVID-19, I can wash my hands correctly  1. Strongly Disagree 2. Disagree 3.Neutral 4. Agree 5. Strongly agree | | | | |
| 421 | To prevent COVID-19, I can maintain social distance  1. Strongly Disagree 2. Disagree 3.Neutral 4. Agree 5. Strongly agree | | | | |
| 422 | To prevent COIVD 19, I can use mask correctly  1. Strongly Disagree 2. Disagree 3.Neutral 4. Agree 5. Strongly agree | | | | |
| **5.Behavioural responses to COVID-19** | | | | | |
|  | **Which of the following measures have you taken to prevent COVID-19 infection?** | | | | |
| 501 | Washing hand for at least 20 seconds  1. Never 2. Rarely 3. Sometimes 4. Most of the time 5. Always | | | | |
| 502 | Avoid touching your eyes, nose, and mouth with unwashed hands  1. Never 2. Rarely 3. Sometimes 4. Most of the time 5. Always | | | | |
| 503 | Use of disinfectants to clean hands when soap and water is unavailable for washing hands  1. Never 2. Rarely 3. Sometimes 4. Most of the time 5. Always | | | | |
| 504 | Covering your mouth and nose when you cough or sneeze  1. Never 2. Rarely 3. Sometimes 4. Most of the time 5. Always | | | | |
| 505 | Wearing a face mask  1. Never 2. Rarely 3. Sometimes 4. Most of the time 5. Always | | | | |
| 506 | Keeping Physical distance a minimum of 2 meters between you and other persons outside your household.  1. Never 2. Rarely 3. Sometimes 4. Most of the time 5. Always | | | | |
| 507 | Disinfecting different materials or surfaces (like mobile phone, computer, key, table and chair, etc.)  1. Never 2. Rarely 3. Sometimes 4. Most of the time 5. Always | | | | |

**Open ended questions for the in-depth interview**

**Interview guide for key informants**

1. How message or information related to corona virus has been transmitted to the community? a) What are the means used to address information to the community

b) The continuity of information dissemination to the community

1. How do you see the awareness of the community about corona virus?
2. How do you see the community’s implementation of COVID-19 preventive measures? Any gap? What will be the reasons? Explain
3. Is there any challenge faced in the prevention and control of COVID-19? Explain
4. What is expects from different stakeholders and the community to better control the spread of COVID-19?

**Interview guide for the general population**

1. Tell me a bit about corona virus? (What is COVID-19? How the virus transmitted? What are the sign/symptoms of COVID-19? And preventive measures?).
2. How do you get information about COVID-19? Preferred and trusted sources, frequency of obtaining information?
3. How do you perceive COVID-19? (Perceived severity, susceptibility, barriers, etc.)
4. How you see your practice of COVID-19 preventive measures?
5. Any gap on implementing the COVID-19 preventive measures? If any why?
6. How do you see the community’s COVID-19 preventive practice? (gaps, explain)
7. What are expected from different responsible bodies and the community to better prevent and control the spread of COVID-19
